# Supplementary material for: Multicenter Registry of Patients Receiving Systemic Mold-Active Triazoles for the Management of Invasive Fungal Infections
Source: PubMed Central journal article supplement — Infect Dis Ther. 2022 Jun 18;11(4):1609–29. doi: 10.1007/s40121-022-00661-5 (PMC9334502; doi:10.1007/s40121-022-00661-5), 2022-06-18
Supplement: 40121_2022_661_MOESM1_ESM.pdf [file 40121_2022_661_MOESM1_ESM.pdf]

## SUPPLEMENTARY MATERIAL

Multicenter Registry of Patients Receiving Systemic Mold-Active Triazoles for the Management of Invasive Fungal Infections

L. Ostrosky-Zeichner<sup>1</sup>, M.H. Nguyen<sup>2</sup>, J. Bubalo<sup>3</sup>, B.D. Alexander<sup>4</sup>, M.H. Miceli<sup>5</sup>, P.G. Pappas<sup>6</sup>, J. Jiang<sup>7</sup>, Y. Song<sup>7</sup> and G.R. Thompson III<sup>8</sup>

<sup>1</sup>McGovern Medical School, Houston, Texas, USA; <sup>2</sup>University of Pittsburgh Medical Center, Pittsburgh, Pennsylvania, USA; <sup>3</sup>Oregon Health and Science University Hospitals and Clinics, Portland, Oregon, USA; <sup>4</sup>Duke University, Durham, North Carolina, USA; <sup>5</sup>University of Michigan, Ann Arbor, Michigan, USA; <sup>6</sup>University of Alabama at Birmingham, Birmingham, Alabama, USA; <sup>7</sup>Astellas Pharma Global Development, Inc., Northbrook, Illinois, USA; <sup>8</sup>UC Davis Health, Sacramento, California, USA

**\*Corresponding author:**

Name: Luis Ostrosky-Zeichner

Address: McGovern Medical School, Houston, Texas, USA

Email: Luis.Ostrosky-Zeichner@uth.tmc.edu

**Supplementary Table 1.** List of investigators

---

| <b>Site Number</b> | <b>Site Name</b>                                                   | <b>IRB Name, IRB Approval Date, and Document ID/IRB Number</b> |
|--------------------|--------------------------------------------------------------------|----------------------------------------------------------------|
| 20001              | The Regents of the University of California Davis                  | University of California Davis, 15Dec2017, 1117803-1           |
| 20002              | Ochsner Clinic Foundation                                          | Ochsner Clinic Foundation, 29Sep2016, 2016.222.A               |
| 20003              | Rhode Island Hospital                                              | Lifespan, 21Nov2016, 00000396                                  |
| 20004              | Loyola University Medical Center                                   | Loyola University Chicago, 24Oct2016, 209043102416             |
| 20005              | Henry Ford Health System                                           | Henry Ford Health System, 23Aug2016, 10723                     |
| 20006              | Indiana University Health, Inc. d/b/a Methodist Research Institute | Western Institutional Review Board (WIRB), 16Sep2016, 20161781 |
| 20007              | The University of Chicago                                          | University of Chicago BSD, 13Dec2016, 16-1381                  |
| 20008              | Northwestern University                                            | Northwestern University, 20Jan2017, STU00203904                |
| 20009              | Yale University                                                    | Yale, 30Jan2017, 2000020126                                    |
| 20010              | University of Kentucky                                             | University of Kentucky, 6Nov2016, 16-0845-P1G                  |
| 20011              | Regents of the University of Colorado                              | University of Colorado Denver, 10Jan2017, 16-1901              |

|       |                                                  |                                                                    |
|-------|--------------------------------------------------|--------------------------------------------------------------------|
| 20014 | Trustees of the University of Pennsylvania       | University of Pennsylvania, 09May2017, 827208                      |
| 20015 | Augusta University Research Institute, Inc.      | Georgia Regents University, 20Dec2016,<br>954051-2                 |
| 20017 | The University of Texas Health Science Center    | Western Institutional Review Board (WIRB), 18Jan2017, 1170842      |
| 20018 | Regional Infectious Diseases and Infusion, Inc.  | St. Rita's Health Partners, 5Dec2016,<br>9766-MA-3034              |
| 20020 | St. Joseph's Hospital and Medical Center         | Dignity Health, 22Mar2017, PHXA-16-0190-80-18                      |
| 20021 | The University of Arizona                        | Western Institutional Review Board (WIRB), 07Feb2017, 1171916      |
| 20022 | Roswell Park Cancer Institute                    | Roswell Park, 28Feb2017,<br>STUDY00000211 / P 34916                |
| 20023 | The Regents of the University of Minnesota       | University of Minnesota, 09Jan2016,<br>1611M00462                  |
| 20024 | University Hospitals of Cleveland Medical Center | University Hospitals Cleveland Medical Center, 04Jan2017, 12-16-31 |
| 20025 | Wake Forest University Health Sciences           | Wake Forest University, 09Jan2017, IRB00041578                     |
| 20027 | University of Nebraska Medical Center            | University of Nebraska Medical Center, 13Apr2017, 200-17-EP        |
| 20028 | University of Nebraska Medical Center            | University of Nebraska Medical Center, 27Feb2017, 085-17-EP        |
| 20029 | Wayne State University                           | Wayne State University, 04Apr2017, 016517MP2E                      |
| 20030 | Duke University                                  | Duke Medicine, 21Mar2017, Pro00077960                              |
| 20031 | Virginia Commonwealth University                 | WIRB, 07Jun2017, 1172018                                           |
| 20032 | Regents of the University of Michigan            | University of Michigan, 11Jul2017, HUM00125272                     |

|       |                                                                         |                                                                            |
|-------|-------------------------------------------------------------------------|----------------------------------------------------------------------------|
| 20034 | The Regents of the University of New Mexico                             | UNM Health Sciences Center, 22Jan2018, 17-458                              |
| 20035 | Emory University                                                        | Emory University, 12Jun2017, IRB00093091                                   |
| 20037 | Memorial Sloan-Kettering Cancer Center                                  | Memorial Sloan Kettering Cancer Center, 28Sep2017, 17-488                  |
| 20038 | The University of Alabama at Birmingham                                 | WIRB, 15Jun2017, 1175663                                                   |
| 20040 | Joseph M. Still Research Foundation, Inc.                               | WIRB, 28Jun2017, 1176722                                                   |
| 20041 | St Jude Children's Research Hospital, Inc                               | St. Jude Children's Research Hospital, 16Feb2017, Pro00007367              |
| 20042 | Washington University                                                   | Washington University in St. Louis, 21Sep2017, 201703167                   |
| 20043 | Mayo Clinic Arizona                                                     | Mayo Clinic, 13Jun2017, 17-000941                                          |
| 20044 | University of Pittsburgh Medical Center                                 | WIRB, 16May2017, 1174859                                                   |
| 20046 | The Board of Trustees of the Leland Stanford Junior University          | Stanford University, 26May2017, 4947                                       |
| 20048 | Mayo Clinic                                                             | Mayo Clinic, 10Apr2017, 17-001351                                          |
| 20049 | Beth Israel Deaconess Medical Center, Inc                               | Beth Israel Deaconess Medical Center, 26Jul2017, 2017P000209               |
| 20050 | Los Angeles Biomedical Research Institute at Harbor-UCLA Medical Center | WIRB, 09Oct2017, 1178359                                                   |
| 20051 | Hackensack University Medical Center                                    | WIRB, 22Aug2017, 1177142                                                   |
| 20052 | Rutgers, The State University of New Jersey                             | Rutgers/Robert Wood Johnson University Hospital Somerset, 18Apr2017, 17-03 |
| 20053 | University of Kansas Medical Center Research Institute, Inc             | The University of Kansas Medical Center, 19Jun2017, IRB00000161            |
| 20054 | University of Washington                                                | WIRB, 31Jul2017, 1177035                                                   |

|       |                                                                               |                                                                           |
|-------|-------------------------------------------------------------------------------|---------------------------------------------------------------------------|
| 20055 | The Brigham & Women's Hospital, Inc.                                          | Partners Healthcare, 30Nov2017, 2017P002560/PHS                           |
| 20057 | Good Samaritan Hospital Corvallis                                             | Samaritan Health Services, 26Oct2017, 17-074                              |
| 20058 | Ann & Robert H Lurie Children's Hospital of Chicago<br>d/b/a Lurie Children's | Ann & Robert H Lurie Children's Hospital of Chicago, 19Jan2018, 2018-1485 |
| 20059 | Olive View – UCLA Education and Research<br>Institute                         | Olive View – UCLA Education and Research Institute, 23Jan2018, 1180092-1  |
| 20060 | Oregon Health & Science University                                            | Oregon Health & Science University, 9Jan2018, STUDY00017916               |
| 20061 | The Children's Mercy Hospital                                                 | WIRB, 12Apr2018, 1180143                                                  |
| 20062 | The Cooper Health System                                                      | Cooper University Hospital, 20Sep2018, 17-192EX9                          |
| 20063 | West Virginia University Research Corporation                                 | West Virginia University, 15Feb2018, 1712902340                           |
| 20064 | Joan and Sanford I. Weill Medical College                                     | Weil Cornell Medicine, 26Jul2018, 1801018921                              |
| 20065 | The Board of Trustees of the University of Illinois                           | UIC, 20Apr2018, 2018-0031                                                 |
| 20066 | Drexel University                                                             | WIRB, 25Feb2018, 1183450                                                  |
| 20067 | The Administrator of the Tulane Education Fund<br>d/b/a Tulane<br>University  | Tulane University, 03Jul2018,<br>2017-886                                 |
| 20071 | Norton Cancer Institute                                                       | WIRB, 11Jun2018, 1187166                                                  |
| 20072 | Springfield Clinic, LLP                                                       | WIRB-Copernicus Group, 12Feb2018,1242228                                  |
| 20073 | Swedish Health Services                                                       | WIRB, 31May2018, 1186497                                                  |
| 20074 | The Regents of the University of California                                   | UCLA, 06Jun2018, 18-000490                                                |



**Supplementary Table 2.** Investigator’s assessment of response; definitions of clinical, mycological, radiological and prophylactic response

---

| <b>Investigator’s assessment of clinical response</b> |                                                                        |
|-------------------------------------------------------|------------------------------------------------------------------------|
| Success                                               | Resolution of some or all attributable signs and symptoms.             |
| No success                                            | No resolution of any attributable signs and symptoms and/or worsening. |
| No attributable signs and symptoms                    |                                                                        |
| Results not available/patient unevaluable             |                                                                        |

---

| <b>Investigator’s assessment of mycological response</b> |                                                                                                                                                                                                                                       |
|----------------------------------------------------------|---------------------------------------------------------------------------------------------------------------------------------------------------------------------------------------------------------------------------------------|
| Eradication                                              | Two consecutive negative cultures on two separate days from all previously infected normally sterile sites or histologically documented absence of the infecting fungal species from the primary site.                                |
| Presumed eradication                                     | Resolution of attributable clinical signs and symptoms of infection plus contraindication to culture of biopsy of previously infected normally sterile sites (only for non-bloodstream infections).                                   |
| Persistence                                              | Positive culture or histological signs from a normally sterile site.                                                                                                                                                                  |
| Presumed persistence                                     | Missing culture or biopsy in the absence of resolution of all attributable signs and symptoms of infection or contraindication to culture of biopsy in the absence of resolution of all attributable signs and symptoms of infection. |

Indeterminate

All other situations, e.g., patient lost to follow up.

Results not available/patient unevaluable

---

**Investigator's assessment of radiological response**

---

≥ 90% improvement

≥ 50% to < 90% improvement

≥ 25% to < 50% improvement

< 25% improvement

No signs on radiological images

Results not available/patient unevaluable

---

**Investigator's assessment of prophylactic response**

---

No breakthrough infection

Breakthrough infection



**Supplementary Table 3. Infections other than IFIs (FAS)**

|                                                                             | <b>Isavuconazole<br/>(<i>n</i> = 510)</b> | <b>Posaconazole<br/>(<i>n</i> = 540)</b> | <b>Voriconazole<br/>(<i>n</i> = 491)</b> | <b>Multiple/<br/>sequenced<br/>therapies<br/>(<i>n</i> = 452)</b> | <b>Total<br/>(<i>N</i> = 1993)</b> |
|-----------------------------------------------------------------------------|-------------------------------------------|------------------------------------------|------------------------------------------|-------------------------------------------------------------------|------------------------------------|
| <b>Patients with <math>\geq 1</math> non-fungal infection, <i>n</i> (%)</b> |                                           |                                          |                                          |                                                                   |                                    |
| No                                                                          | 228 (44.7)                                | 242 (44.8)                               | 189 (38.5)                               | 139 (30.8)                                                        | 798 (40.0)                         |
| Yes                                                                         | 282 (55.3)                                | 298 (55.2)                               | 302 (61.5)                               | 313 (69.2)                                                        | 1195 (60.0)                        |
| <b>Infection type, <i>n</i> (%)</b>                                         | 281                                       | 298                                      | 302                                      | 313                                                               | 1194                               |
| Bacterial                                                                   | 224 (79.7)                                | 250 (83.9)                               | 258 (85.4)                               | 269 (85.9)                                                        | 1001 (83.8)                        |
| Viral                                                                       | 99 (35.2)                                 | 114 (38.3)                               | 93 (30.8)                                | 121 (38.7)                                                        | 427 (35.8)                         |
| Mucosal yeast (non-invasive)                                                | 4 (1.4)                                   | 3 (1.0)                                  | 6 (2.0)                                  | 3 (1.0)                                                           | 16 (1.3)                           |
| Parasitic                                                                   | 0                                         | 1 (0.3)                                  | 1 (0.3)                                  | 2 (0.6)                                                           | 4 (0.3)                            |
| Other infection                                                             | 9 (3.2)                                   | 10 (3.4)                                 | 12 (4.0)                                 | 16 (5.1)                                                          | 47 (3.9)                           |
| Missing data                                                                | 1                                         | 0                                        | 0                                        | 0                                                                 | 1                                  |
| <b>Antibiotic agents received for bacterial infection , <i>n</i></b>        | 224                                       | 250                                      | 255                                      | 267                                                               | 996                                |
| None                                                                        | 8 (3.6)                                   | 21 (8.4)                                 | 20 (7.8)                                 | 23 (8.6)                                                          | 72 (7.2)                           |
| One                                                                         | 133 (59.4)                                | 161 (64.4)                               | 142 (55.7)                               | 167 (62.5)                                                        | 603 (60.5)                         |
| Two                                                                         | 80 (35.7)                                 | 87 (34.8)                                | 85 (33.3)                                | 107 (40.1)                                                        | 359 (36.0)                         |

|              |           |           |           |           |            |
|--------------|-----------|-----------|-----------|-----------|------------|
| ≥Three       | 52 (23.2) | 59 (23.6) | 58 (22.7) | 66 (24.7) | 235 (23.6) |
| Missing data | 0         | 0         | 3         | 2         | 5          |

---

Data shown are n (%), unless otherwise indicated. Table shows actual number of patients with an assessment (n). Only infections that started on/after index/enrollment are presented. Percentages are based on the number of patients in the FAS with ≥1 non-fungal infection or *n* for that parameter. Patients were counted in multiple sub-categories, but only once per sub-category. FAS, full analysis set.

**Supplementary Table 4.** Investigator’s assessment of patient responses to mold-active triazole therapies at study end by (a) *Aspergillus fumigatus*, (b) *Aspergillus non-fumigatus*, (c) *Candida* and (d) *Aspergillus/Candida* species (FAS)

**(a) *Aspergillus fumigatus* (FAS)**

|                                                  | <b>Isavuconazole<br/>(n = 44)</b> | <b>Posaconazole<br/>(n = 18)</b> | <b>Voriconazole<br/>(n = 37)</b> | <b>Multiple/<br/>sequenced<br/>therapies<br/>(n = 32)</b> | <b>Total<br/>(N = 131)</b> |
|--------------------------------------------------|-----------------------------------|----------------------------------|----------------------------------|-----------------------------------------------------------|----------------------------|
| <b>Clinical response assessment, n</b>           | 42                                | 14                               | 36                               | 28                                                        | 120                        |
| Resolution of all attributable signs/symptoms    | 18 (42.9)                         | 10 (71.4)                        | 10 (27.8)                        | 9 (32.1)                                                  | 47 (39.2)                  |
| Resolution of some attributable signs/symptoms   | 14 (33.3)                         | 3 (21.4)                         | 13 (36.1)                        | 11 (39.3)                                                 | 41 (34.2)                  |
| No resolution of any attributable signs/symptoms | 8 (19.0)                          | 1 (7.1)                          | 10 (27.8)                        | 5 (17.9)                                                  | 24 (20.0)                  |
| No attributable signs/symptoms                   | 1 (2.4)                           | 0                                | 2 (5.6)                          | 0                                                         | 3 (2.5)                    |
| Results not available/patient unevaluable        | 1 (2.4)                           | 0                                | 1 (2.8)                          | 3 (10.7)                                                  | 5 (4.2)                    |
| <b>Mycological response assessment, n</b>        | 37                                | 14                               | 33                               | 26                                                        | 110                        |
| Eradication                                      | 12 (32.4)                         | 3 (21.4)                         | 6 (18.2)                         | 4 (15.4)                                                  | 25 (22.7)                  |
| Presumed eradication                             | 8 (21.6)                          | 4 (28.6)                         | 15 (45.5)                        | 8 (30.8)                                                  | 35 (31.8)                  |
| Persistence                                      | 4 (10.8)                          | 1 (7.1)                          | 3 (9.1)                          | 4 (15.4)                                                  | 12 (10.9)                  |
| Presumed persistence                             | 2 (5.4)                           | 2 (14.3)                         | 2 (6.1)                          | 3 (11.5)                                                  | 9 (8.2)                    |

|                                                   |           |          |          |          |           |
|---------------------------------------------------|-----------|----------|----------|----------|-----------|
| Indeterminate                                     | 2 (5.4)   | 0        | 0        | 0        | 2 (1.8)   |
| Results not available/patient unevaluable         | 9 (24.3)  | 4 (28.6) | 7 (21.2) | 7 (26.9) | 27 (24.5) |
| <b>Radiological response assessment, <i>n</i></b> | 36        | 11       | 31       | 24       | 102       |
| ≥ 90% improvement                                 | 11 (30.6) | 3 (27.3) | 4 (12.9) | 9 (37.5) | 27 (26.5) |
| ≥ 50% to < 90% improvement                        | 4 (11.1)  | 2 (18.2) | 9 (29.0) | 7 (29.2) | 22 (21.6) |
| ≥ 25% to < 50% improvement                        | 6 (16.7)  | 1 (9.1)  | 1 (3.2)  | 0        | 8 (7.8)   |
| < 25% improvement                                 | 9 (25.0)  | 2 (18.2) | 8 (25.8) | 7 (29.2) | 26 (25.5) |
| No signs on radiological images                   | 1 (2.8)   | 1 (9.1)  | 3 (9.7)  | 0        | 5 (4.9)   |
| Results not available/patient unevaluable         | 5 (13.9)  | 2 (18.2) | 6 (19.4) | 1 (4.2)  | 14 (13.7) |

**(b) *Aspergillus non-fumigatus* (FAS)**

|                                                  | <b>Isavuconazole<br/>(<i>n</i> = 9)</b> | <b>Posaconazole<br/>(<i>n</i> = 3)</b> | <b>Voriconazole<br/>(<i>n</i> = 16)</b> | <b>Multiple/<br/>sequenced<br/>therapies<br/>(<i>n</i> = 12)</b> | <b>Total<br/>(<i>N</i> = 40)</b> |
|--------------------------------------------------|-----------------------------------------|----------------------------------------|-----------------------------------------|------------------------------------------------------------------|----------------------------------|
| <b>Clinical response assessment, <i>n</i></b>    | 9                                       | 3                                      | 16                                      | 12                                                               | 40                               |
| Resolution of all attributable signs/symptoms    | 6 (66.7)                                | 1 (33.3)                               | 7 (43.8)                                | 6 (50.0)                                                         | 20 (50.0)                        |
| Resolution of some attributable signs/symptoms   | 1 (11.1)                                | 0                                      | 4 (25.0)                                | 3 (25.0)                                                         | 8 (20.0)                         |
| No resolution of any attributable signs/symptoms | 2 (22.2)                                | 1 (33.3)                               | 3 (18.8)                                | 1 (8.3)                                                          | 7 (17.5)                         |

|                                                   |          |          |           |           |           |
|---------------------------------------------------|----------|----------|-----------|-----------|-----------|
| No attributable signs/symptoms                    | 0        | 1 (33.3) | 1 (6.3)   | 1 (8.3)   | 3 (7.5)   |
| Results not available/patient unevaluable         | 0        | 0        | 1 (6.3)   | 1 (8.3)   | 2 (5.0)   |
| <b>Mycological response assessment, <i>n</i></b>  | <b>8</b> | <b>2</b> | <b>11</b> | <b>10</b> | <b>31</b> |
| Eradication                                       | 2 (25.0) | 1 (50.0) | 4 (36.4)  | 1 (10.0)  | 8 (25.8)  |
| Presumed eradication                              | 4 (50.0) | 0        | 4 (36.4)  | 3 (30.0)  | 11 (35.5) |
| Persistence                                       | 1 (12.5) | 0        | 2 (18.2)  | 2 (20.0)  | 5 (16.1)  |
| Presumed persistence                              | 0        | 1 (50.0) | 0         | 2 (20.0)  | 3 (9.7%)  |
| Indeterminate                                     | 0        | 0        | 0         | 0         | 0         |
| Results not available/patient unevaluable         | 1 (12.5) | 0        | 1 (9.1)   | 2 (20.0)  | 4 (12.9)  |
| <b>Radiological response assessment, <i>n</i></b> | <b>6</b> | <b>3</b> | <b>10</b> | <b>12</b> | <b>31</b> |
| ≥ 90% improvement                                 | 4 (66.7) | 0        | 4 (40.0)  | 4 (33.3)  | 12 (38.7) |
| ≥ 50% to < 90% improvement                        | 1 (16.7) | 1 (33.3) | 1 (10.0)  | 1 (8.3)   | 4 (12.9)  |
| ≥ 25% to < 50% improvement                        | 1 (16.7) | 0        | 0         | 1 (8.3)   | 2 (6.5)   |
| < 25% improvement                                 | 0        | 1 (33.3) | 1 (10.0)  | 2 (16.7)  | 4 (12.9)  |
| No signs on radiological images                   | 0        | 1 (33.3) | 3 (30.0)  | 1 (8.3)   | 5 (16.1)  |
| Results not available/patient unevaluable         | 0        | 0        | 1 (10.0)  | 3 (25.0)  | 4 (12.9)  |

**(c) *Candida* (FAS)**

|                                                  | <b>Isavuconazole<br/>(n = 27)</b> | <b>Posaconazole<br/>(n = 20)</b> | <b>Voriconazole<br/>(n = 31)</b> | <b>Multiple/<br/>sequenced<br/>therapies<br/>(n = 31)</b> | <b>Total<br/>(N = 109)</b> |
|--------------------------------------------------|-----------------------------------|----------------------------------|----------------------------------|-----------------------------------------------------------|----------------------------|
| <b>Clinical response assessment, n</b>           | 20                                | 13                               | 27                               | 25                                                        | 85                         |
| Resolution of all attributable signs/symptoms    | 10 (50.0)                         | 7 (53.8)                         | 10 (37.0)                        | 10 (40.0)                                                 | 37 (43.5)                  |
| Resolution of some attributable signs/symptoms   | 3 (15.0)                          | 1 (7.7)                          | 12 (44.4)                        | 7 (28.0)                                                  | 23 (27.1)                  |
| No resolution of any attributable signs/symptoms | 4 (20.0)                          | 2 (15.4)                         | 3 (11.1)                         | 3 (12.0)                                                  | 12 (14.1)                  |
| No attributable signs/symptoms                   | 3 (15.0)                          | 3 (23.1)                         | 1 (3.7)                          | 5 (20.0)                                                  | 12 (14.1)                  |
| Results not available/patient unevaluable        | 0                                 | 0                                | 1 (3.7)                          | 0                                                         | 1 (1.2)                    |
| <b>Mycological response assessment, n</b>        | 17                                | 9                                | 25                               | 23                                                        | 74                         |
| Eradication                                      | 4 (23.5)                          | 3 (33.3)                         | 5 (20.0)                         | 8 (34.8)                                                  | 20 (27.0)                  |
| Presumed eradication                             | 6 (35.3)                          | 4 (44.4)                         | 8 (32.0)                         | 5 (21.7)                                                  | 23 (31.1)                  |
| Persistence                                      | 1 (5.9)                           | 0                                | 2 (8.0)                          | 1 (4.3)                                                   | 4 (5.4)                    |
| Presumed persistence                             | 2 (11.8)                          | 1 (11.1)                         | 4 (16.0)                         | 1 (4.3)                                                   | 8 (10.8)                   |
| Indeterminate                                    | 0                                 | 0                                | 0                                | 0                                                         | 0                          |
| Results not available/patient unevaluable        | 4 (23.5)                          | 1 (11.1)                         | 6 (24.0)                         | 8 (34.8)                                                  | 19 (25.7)                  |
| <b>Radiological response assessment, n</b>       | 14                                | 8                                | 19                               | 19                                                        | 60                         |
| ≥ 90% improvement                                | 4 (28.6)                          | 3 (37.5)                         | 1 (5.3)                          | 5 (26.3)                                                  | 13 (21.7)                  |
| ≥ 50% to < 90% improvement                       | 2 (14.3)                          | 0                                | 5 (26.3)                         | 3 (15.8)                                                  | 10 (16.7)                  |

|                                           |          |          |          |          |           |
|-------------------------------------------|----------|----------|----------|----------|-----------|
| ≥ 25% to < 50% improvement                | 0        | 0        | 4 (21.1) | 2 (10.5) | 6 (10.0)  |
| < 25% improvement                         | 4 (28.6) | 3 (37.5) | 3 (15.8) | 4 (21.1) | 14 (23.3) |
| No signs on radiological images           | 1 (7.1)  | 1 (12.5) | 3 (15.8) | 2 (10.5) | 7 (11.7)  |
| Results not available/patient unevaluable | 3 (21.4) | 1 (12.5) | 3 (15.8) | 3 (15.8) | 10 (16.7) |

**(d) *Aspergillus/Candida* (FAS)**

|                                                  | <b>Isavuconazole<br/>(n = 4)</b> | <b>Posaconazole<br/>(n = 1)</b> | <b>Voriconazole<br/>(n = 10)</b> | <b>Multiple/<br/>sequenced<br/>therapies<br/>(n = 9)</b> | <b>Total<br/>(N = 24)</b> |
|--------------------------------------------------|----------------------------------|---------------------------------|----------------------------------|----------------------------------------------------------|---------------------------|
| <b>Clinical response assessment, n</b>           | 4                                | 1                               | 9                                | 6                                                        | 20                        |
| Resolution of all attributable signs/symptoms    | 0                                | 0                               | 4 (44.4)                         | 2 (33.3)                                                 | 6 (30.0)                  |
| Resolution of some attributable signs/symptoms   | 2 (50.0)                         | 0                               | 2 (22.2)                         | 1 (16.7)                                                 | 5 (25.0)                  |
| No resolution of any attributable signs/symptoms | 2 (50.0)                         | 1 (100)                         | 2 (22.2)                         | 3 (50.0)                                                 | 8 (40.0)                  |
| No attributable signs/symptoms                   | 0                                | 0                               | 1 (11.1)                         | 0                                                        | 1 (5.0)                   |
| Results not available/patient unevaluable        | 0                                | 0                               | 0                                | 0                                                        | 0                         |
| <b>Mycological response assessment, n</b>        | 4                                | 1                               | 9                                | 6                                                        | 20                        |
| Eradication                                      | 0                                | 0                               | 0                                | 0                                                        | 0                         |
| Presumed eradication                             | 1 (25.0)                         | 0                               | 5 (55.6)                         | 2 (33.3)                                                 | 8 (40.0)                  |

|                                                   |          |           |          |          |           |
|---------------------------------------------------|----------|-----------|----------|----------|-----------|
| Persistence                                       | 1 (25.0) | 0         | 2 (22.2) | 2 (33.3) | 5 (25.0)  |
| Presumed persistence                              | 1 (25.0) | 0         | 0        | 0        | 1 (5.0)   |
| Indeterminate                                     | 0        | 1 (100.0) | 0        | 0        | 1 (5.0)   |
| Results not available/patient unevaluable         | 1 (25.0) | 0         | 2 (22.2) | 2 (33.3) | 5 (25.0)  |
| <b>Radiological response assessment, <i>n</i></b> | <b>4</b> | <b>1</b>  | <b>9</b> | <b>6</b> | <b>20</b> |
| ≥ 90% improvement                                 | 0        | 0         | 2 (22.2) | 1 (16.7) | 3 (15.0)  |
| ≥ 50% to < 90% improvement                        | 0        | 0         | 2 (22.2) | 1 (16.7) | 3 (15.0)  |
| ≥ 25% to < 50% improvement                        | 1 (25.0) | 0         | 0        | 0        | 1 (5.0)   |
| < 25% improvement                                 | 1 (25.0) | 1 (100.0) | 4 (44.4) | 2 (33.3) | 8 (40.0)  |
| No signs on radiological images                   | 1 (25.0) | 0         | 1 (11.1) | 0        | 2 (10.0)  |
| Results not available/patient unevaluable         | 1 (25.0) | 0         | 0        | 2 (33.3) | 3 (15.0)  |

Data shown are *n* (%), unless otherwise indicated. Table shows actual number of patients with an assessment (*n*). Since treatment groups were not randomized and assessment results were not adjusted, any perceived differences between treatment groups could be due to other confounders and not treatment effects. Note that patients who received prophylaxis may have transitioned to treatment during the course of the study.
